# Supplementary material for: Rift Valley Fever Virus Propagates in Human Villous Trophoblast Cell Lines and Induces Cytokine mRNA Responses Known to Provoke Miscarriage
Source: MDPI journal article supplement (doi:10.3390/v13112265), 2021-11-12
Supplement: s1 [file s1]

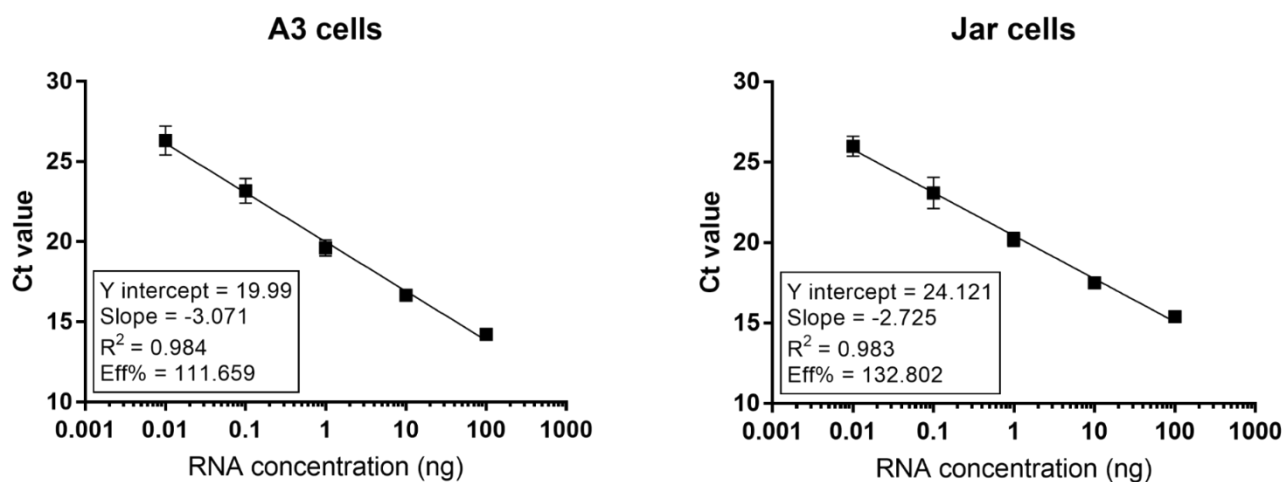

| 18S ribosomal RNA control              | Cell Line | RNA concentration (ng) |              |              |              |              |  | NTC          |
|----------------------------------------|-----------|------------------------|--------------|--------------|--------------|--------------|--|--------------|
|                                        |           | 0.01                   | 0.1          | 1            | 10           | 100          |  |              |
| average Ct values ± standard deviation | A3        | 26.31 ± 0.74           | 23.17 ± 0.63 | 19.60 ± 0.40 | 16.65 ± 0.11 | 14.22 ± 0.15 |  | Undetermined |
|                                        | JAR       | 25.98 ± 0.51           | 23.00 ± 0.79 | 20.21 ± 0.35 | 17.50 ± 0.17 | 15.40 ± 0.04 |  |              |

**Supplementary Figure 1.** Standard Curve of 18S ribosomal RNA control (ThermoFisher, Cat No. 4319413E, VIC™/MGB probe, primer limited). Each data point represents the average Ct values ± standard deviation ( $n=3$ ). The dynamic range of total RNA extracted from A3, and Jar cells were used to generate a standard curve of r18S ribosomal RNA control. As a result, all initial template concentrations plotted on the graph appear to be in the linear dynamic range for the system.

**Supplementary Table 1.** Average Ct values  $\pm$  standard deviation for mRNA expression. RVFV, cytokines, and the endogenous control gene 18S rRNA, in A3 and Jar cells. Before and at different time points after RVFV infection ( $n = 6$ ).

| Cell Line | RVFV or Cytokines | Mock-infection            |                  |                  | wt ZH548         |                  | $\Delta$ NSs:Katuskha |                  | 18s rRNA         |
|-----------|-------------------|---------------------------|------------------|------------------|------------------|------------------|-----------------------|------------------|------------------|
|           |                   | 0h                        | 6h               | 24h              | 6h               | 24h              | 6h                    | 24h              |                  |
| A3        | RVFV              | 36.51 $\pm$ 1.33          | 38.07 $\pm$ 0.89 | 34.26 $\pm$ 2.04 | 23.58 $\pm$ 0.92 | 20.34 $\pm$ 0.37 | 24.58 $\pm$ 0.85      | 18.51 $\pm$ 0.24 | 16.46 $\pm$ 0.89 |
|           | IFN $\alpha$ 1    | 27.72 $\pm$ 0.48          | 26.44 $\pm$ 0.26 | 26.21 $\pm$ 0.45 | 26.12 $\pm$ 0.31 | 25.63 $\pm$ 0.33 | 26.41 $\pm$ 0.54      | 25.82 $\pm$ 0.42 | 16.02 $\pm$ 0.67 |
|           | IFN $\beta$ 1     | 27.44 $\pm$ 0.41          | 26.18 $\pm$ 0.39 | 26.12 $\pm$ 0.38 | 25.86 $\pm$ 0.51 | 25.20 $\pm$ 0.41 | 26.28 $\pm$ 0.28      | 20.78 $\pm$ 0.38 | 15.53 $\pm$ 0.76 |
|           | IFN $\gamma$ 1    | Undetermined <sup>1</sup> | 38.19 $\pm$ 1.70 | 39.17 $\pm$ 0.70 | 39.45 $\pm$ 0.00 | 39.65 $\pm$ 0.31 | 39.24 $\pm$ 0.10      | 39.24 $\pm$ 0.33 | 16.90 $\pm$ 0.75 |
|           | IFN $\lambda$     | 38.85 $\pm$ 0.58          | 39.21 $\pm$ 0.34 | 36.20 $\pm$ 1.11 | 34.84 $\pm$ 1.82 | 27.40 $\pm$ 1.94 | 31.91 $\pm$ 2.44      | 20.68 $\pm$ 0.59 | 17.30 $\pm$ 0.72 |
|           | IL-4              | 38.50 $\pm$ 0.02          | 37.05 $\pm$ 0.16 | 38.41 $\pm$ 0.31 | 38.64 $\pm$ 0.03 | 35.81 $\pm$ 0.26 | 37.92 $\pm$ 0.73      | 35.61 $\pm$ 0.77 | 17.26 $\pm$ 0.80 |
|           | IL-5              | 35.80 $\pm$ 0.33          | 35.95 $\pm$ 0.50 | 35.63 $\pm$ 0.47 | 35.64 $\pm$ 0.28 | 32.16 $\pm$ 0.14 | 35.96 $\pm$ 0.26      | 36.64 $\pm$ 0.13 | 16.04 $\pm$ 0.66 |
|           | IL-1 $\beta$      | 25.93 $\pm$ 0.87          | 25.85 $\pm$ 1.19 | 25.01 $\pm$ 0.81 | 24.44 $\pm$ 0.91 | 22.96 $\pm$ 1.18 | 26.97 $\pm$ 1.15      | 21.50 $\pm$ 1.01 | 17.52 $\pm$ 1.19 |
|           | IL-6              | 28.46 $\pm$ 1.39          | 28.68 $\pm$ 1.42 | 28.23 $\pm$ 1.41 | 28.99 $\pm$ 2.03 | 26.72 $\pm$ 0.87 | 28.58 $\pm$ 0.92      | 21.47 $\pm$ 1.16 | 14.11 $\pm$ 2.77 |
|           | IL-8              | 24.40 $\pm$ 0.70          | 25.90 $\pm$ 0.58 | 24.46 $\pm$ 0.21 | 25.40 $\pm$ 1.71 | 22.71 $\pm$ 0.35 | 25.56 $\pm$ 0.56      | 17.13 $\pm$ 0.33 | 15.93 $\pm$ 1.00 |
|           | TNF- $\alpha$     | 36.93 $\pm$ 0.53          | 37.93 $\pm$ 0.85 | 36.98 $\pm$ 0.81 | 37.85 $\pm$ 1.20 | 34.07 $\pm$ 2.49 | 37.90 $\pm$ 1.51      | 29.26 $\pm$ 1.71 | 16.45 $\pm$ 0.77 |
|           | IL-10             | 38.00 $\pm$ 0.72          | 36.53 $\pm$ 0.78 | 38.38 $\pm$ 0.88 | 36.98 $\pm$ 0.38 | 32.13 $\pm$ 1.08 | 37.82 $\pm$ 0.79      | 35.29 $\pm$ 1.19 | 16.65 $\pm$ 0.73 |
|           | TGF- $\beta$ 1    | 26.98 $\pm$ 1.53          | 26.76 $\pm$ 1.56 | 27.23 $\pm$ 1.80 | 27.71 $\pm$ 2.24 | 27.71 $\pm$ 2.19 | 27.71 $\pm$ 1.71      | 28.52 $\pm$ 2.00 | 19.01 $\pm$ 2.38 |
|           | TP53              | 27.83 $\pm$ 0.31          | 27.74 $\pm$ 0.25 | 27.46 $\pm$ 0.44 | 27.92 $\pm$ 0.56 | 28.07 $\pm$ 0.61 | 27.51 $\pm$ 0.59      | 29.18 $\pm$ 0.27 | 16.92 $\pm$ 0.77 |
|           | LC3               | 27.66 $\pm$ 1.15          | 27.35 $\pm$ 1.23 | 27.47 $\pm$ 1.52 | 28.23 $\pm$ 0.90 | 29.00 $\pm$ 0.61 | 28.07 $\pm$ 1.26      | 29.76 $\pm$ 1.21 | 19.96 $\pm$ 2.43 |
|           | NF- $\kappa$ B    | 32.03 $\pm$ 0.27          | 32.02 $\pm$ 0.40 | 31.86 $\pm$ 0.17 | 31.84 $\pm$ 0.60 | 32.72 $\pm$ 0.26 | 32.08 $\pm$ 0.28      | 30.26 $\pm$ 0.30 | 17.84 $\pm$ 0.97 |
| JAR       | RVFV              | 34.75 $\pm$ 2.01          | 35.72 $\pm$ 1.25 | 34.26 $\pm$ 1.86 | 25.03 $\pm$ 0.51 | 19.50 $\pm$ 3.17 | 20.62 $\pm$ 1.74      | 14.87 $\pm$ 1.46 | 16.57 $\pm$ 0.98 |
|           | IFN $\alpha$ 1    | 28.14 $\pm$ 0.48          | 28.10 $\pm$ 0.31 | 28.78 $\pm$ 0.26 | 26.48 $\pm$ 0.19 | 26.04 $\pm$ 0.56 | 26.87 $\pm$ 0.38      | 26.35 $\pm$ 0.33 | 15.85 $\pm$ 0.84 |
|           | IFN $\beta$ 1     | 27.37 $\pm$ 0.54          | 27.77 $\pm$ 0.54 | 28.74 $\pm$ 0.70 | 26.62 $\pm$ 0.49 | 26.26 $\pm$ 0.27 | 25.71 $\pm$ 0.44      | 21.22 $\pm$ 0.39 | 15.38 $\pm$ 0.87 |
|           | IFN $\gamma$ 1    | 36.44 $\pm$ 0.42          | 37.22 $\pm$ 0.86 | 36.83 $\pm$ 1.28 | 37.20 $\pm$ 0.60 | 37.21 $\pm$ 1.27 | 36.65 $\pm$ 1.19      | 35.32 $\pm$ 0.40 | 16.97 $\pm$ 0.83 |
|           | IFN $\lambda$     | 35.91 $\pm$ 0.97          | 36.00 $\pm$ 1.23 | 35.61 $\pm$ 1.10 | 29.85 $\pm$ 2.64 | 27.34 $\pm$ 3.80 | 28.49 $\pm$ 3.20      | 19.45 $\pm$ 0.18 | 17.14 $\pm$ 0.80 |
|           | IL-4              | Undetermined              | Undetermined     | Undetermined     | 38.24 $\pm$ 0.00 | 38.01 $\pm$ 0.00 | Undetermined          | Undetermined     | 17.14 $\pm$ 0.97 |
|           | IL-5              | 33.88 $\pm$ 0.33          | 33.56 $\pm$ 0.01 | 33.65 $\pm$ 0.25 | 34.59 $\pm$ 0.10 | 34.39 $\pm$ 0.46 | 34.52 $\pm$ 0.22      | 33.22 $\pm$ 0.25 | 15.96 $\pm$ 1.06 |
|           | IL-1 $\beta$      | 36.11 $\pm$ 0.56          | Undetermined     | 37.09 $\pm$ 1.08 | 35.21 $\pm$ 0.64 | 35.25 $\pm$ 1.08 | 34.77 $\pm$ 0.93      | 32.41 $\pm$ 0.32 | 17.34 $\pm$ 1.11 |
|           | IL-6              | 32.32 $\pm$ 0.95          | 31.40 $\pm$ 1.09 | 30.78 $\pm$ 1.13 | 31.01 $\pm$ 1.44 | 32.07 $\pm$ 0.87 | 30.16 $\pm$ 0.98      | 25.47 $\pm$ 0.99 | 13.90 $\pm$ 2.87 |
|           | IL-8              | 34.79 $\pm$ 1.20          | 35.30 $\pm$ 1.46 | 35.66 $\pm$ 1.02 | 34.16 $\pm$ 1.82 | 34.85 $\pm$ 0.92 | 33.67 $\pm$ 1.60      | 24.40 $\pm$ 1.20 | 16.06 $\pm$ 0.97 |
|           | TNF- $\alpha$     | 34.28 $\pm$ 1.52          | 34.40 $\pm$ 2.21 | 33.07 $\pm$ 1.89 | 33.97 $\pm$ 2.57 | 30.47 $\pm$ 4.38 | 31.00 $\pm$ 3.05      | 24.66 $\pm$ 1.97 | 16.47 $\pm$ 0.88 |
|           | IL-10             | 33.80 $\pm$ 2.00          | 34.25 $\pm$ 2.27 | 33.81 $\pm$ 2.17 | 35.98 $\pm$ 1.50 | 36.88 $\pm$ 2.02 | 35.57 $\pm$ 2.89      | 36.56 $\pm$ 0.40 | 16.57 $\pm$ 0.80 |
|           | TGF- $\beta$ 1    | 29.81 $\pm$ 2.63          | 30.68 $\pm$ 2.83 | 30.41 $\pm$ 2.09 | 29.91 $\pm$ 3.11 | 28.68 $\pm$ 2.80 | 30.09 $\pm$ 3.14      | 29.00 $\pm$ 2.18 | 19.02 $\pm$ 2.39 |
|           | TP53              | 28.26 $\pm$ 0.20          | 28.11 $\pm$ 0.12 | 28.45 $\pm$ 0.36 | 28.69 $\pm$ 0.94 | 29.10 $\pm$ 0.97 | 28.51 $\pm$ 0.97      | 30.27 $\pm$ 0.24 | 16.72 $\pm$ 0.99 |
|           | LC3               | 36.27 $\pm$ 1.06          | 36.49 $\pm$ 1.16 | 36.13 $\pm$ 0.82 | 36.41 $\pm$ 0.86 | 36.35 $\pm$ 1.98 | 35.94 $\pm$ 0.94      | 36.71 $\pm$ 0.46 | 19.80 $\pm$ 2.42 |
|           | NF- $\kappa$ B    | 32.31 $\pm$ 0.16          | 31.93 $\pm$ 0.24 | 32.00 $\pm$ 0.28 | 32.37 $\pm$ 0.19 | 33.42 $\pm$ 0.51 | 31.83 $\pm$ 0.15      | 30.80 $\pm$ 0.55 | 17.71 $\pm$ 0.88 |

<sup>1</sup> Undetermined Ct values were excluded from this study.
